# Supplementary material for: R7 photoreceptor axon targeting depends on the relative levels of lost and found expression in R7 and its synaptic partners
Source: eLife. 2021 May 18;10:e65895. doi: 10.7554/eLife.65895 (PMC8205486; doi:10.7554/eLife.65895)
Supplement: Figure 1—source data 1. [file elife-65895-fig1-data1.xlsx]

## Sheet: Sheet1
Adults							Pupae
	Control	ey>loaf RNAiBL	ey>loaf RNAiKK	GMR>loaf RNAiBL		% R7 mistargeting	40h control	40h loaf RNAi	60h control	60h loaf RNAi
% R7 mistargeting	0	31.03	40	66.6667			0	14.29	0	37.07
	0	25	36.67	52			0	6.667	2.857	51.43
	3.57	46.87	21.42	65.625			0	4.348	0	41.67
	6.9	35.48	46.875	81.0811			10.34	0	2.857	37.07
	15.15	31.03	32	51.5152			0	10	0	43.75
	11.11	29.41	32.1429	78.7879			0	0	4	50
	3.7	21.74	25.9259	56.4103			3.571	0	3.707	6.667
	7.41	37.5	38.4615	35.2941			0	0	0	48.39
	15.79	40	31.0345	55.5556			0			32
	6.06	53.3333		44.8276						45.83
	0	33.3333		58.3333						15.79
		35.4839
		24
		25
		22.7273
		33.2512
