# Supplementary material for: R7 photoreceptor axon targeting depends on the relative levels of lost and found expression in R7 and its synaptic partners
Source: eLife. 2021 May 18;10:e65895. doi: 10.7554/eLife.65895 (PMC8205486; doi:10.7554/eLife.65895)
Supplement: Figure 2—source data 1. [file elife-65895-fig2-data1.xlsx]

## Sheet: Sheet1
Adults
	loafΔ33/Δ20	loaf RNAi; loafΔ33	ey>Cas9, sgRNA	loafΔ33clones	loafΔ33clones; UAS-LoafHA	loafΔ33clones; UAS-Loaf	loafΔ20clones	loafΔ20 clones; UAS-LoafHA	UAS-LoafHA clones
% R7 mistargeting	8	0	39.2857	87.5	30	0	37.5	16.6667	0
	8	13.0435	38.4615	40	33.3333	14.28	50	11.1111	11.1111
	9.09091	11.1111	37.931	80	0	0	44.44	16.6667	0
	15.3846	10	51.7241	55.56	23.0769	0	71.43	18.1818	0
	4.34783	2.9411	40.9091	12.5	44.4444	0	28.57	12.5	13.3333
	9.67742		55	75	11.1111	0	80	0	15.7895
	3.7037		33.3333	71	0	0	80	20	0
	0		26.3158	75	40	0	69.23	0	16.6667
	10.3448		50	31.25	7.69231	33.33	46.15	12.5	0
	3.33333		39.1304	57.14	0	0		7.69231	0
				50	47.0588	0			0
				28.57	0				0
				37.5
				55.5
				50
				66.6
				87.5
				33.3
				75
				18.8
				25
				35.2
				40
				35.7
				7.9
				18.8
				45.45
				66.67
				30
				57.14
				37.5
				57.14
