# Supplementary material for: R7 photoreceptor axon targeting depends on the relative levels of lost and found expression in R7 and its synaptic partners
Source: eLife. 2021 May 18;10:e65895. doi: 10.7554/eLife.65895 (PMC8205486; doi:10.7554/eLife.65895)
Supplement: Figure 3—source data 1. [file elife-65895-fig3-data1.xlsx]

## Sheet: Sheet1
Adults
	loafΔ33/Δ20	Dip-γ-GAL4 rescue	drf-GAL4 rescue	tj-GAL4 rescue
% R7 mistargeting	11.4286	9.67742	12.5	15
	10	14.7059	0	11.9048
	0	5.55556	2.94118	13.8889
	14.2857	14.2857	6.89655	5.88235
	0	7.31707	5.88235	13.7931
	8.82353	6.25		10.5263
	7.4	0		24.2424
	14.29	3.125		9.67742
	12.12	2.94118		8
	4	19.4444
		0
		7.14286
		2.94118
		3.22581
		3.33333
