# Supplementary material for: R7 photoreceptor axon targeting depends on the relative levels of lost and found expression in R7 and its synaptic partners
Source: eLife. 2021 May 18;10:e65895. doi: 10.7554/eLife.65895 (PMC8205486; doi:10.7554/eLife.65895)
Supplement: Figure 4—source data 1. [file elife-65895-fig4-data1.xlsx]

## Sheet: Sheet1
Adults
	loafΔ33/Δ20	ey3.5FLP-GAL4 rescue	repo-GAL4 rescue	hth-GAL4 rescue	bsh-GAL4 rescue	Vsx-GAL4 rescue	ap-GAL4 rescue	ChAT-GAL4 rescue	VGlut-GAL4 rescue
% R7 mistargeting	11.4286	3.125	6.25	11.11	12.5	6.897	5.26316	8.57143	12.5
	10	0	9.677	16	4.76	3.571	4.25532	7.14286	12.12
	0	5.556	9.677	4.348	0	10.34	0	6.25	11.76
	14.2857	0	3.448	8.697	14.29	4	21.6216	4.54545	13.51
	0	7.5	0	4.546	3.225	12	17.5	16.6667	17.24
	8.82353	4.762	0	9.524	6.061	3.03	16.129	24	10.34
	7.4	21.05	3.571	10.71	3.125		3.7037	12	13.33
	14.29	20	0	0	0		15.3846	24.1379	28.57
	12.12	0	13.89		2.941		17.0732	16.6667	9.677
	4	15.63	11.11		3.226		28	25	39.39
		5.405			5.714		22.2222	16.2162	13.79
		5.714					19.4444	16.6667	10.71
							25.8065	18.5185	28
							17.3913	10.8108
							26.087	22.8571
								16.6667
