# Supplementary material for: R7 photoreceptor axon targeting depends on the relative levels of lost and found expression in R7 and its synaptic partners
Source: eLife. 2021 May 18;10:e65895. doi: 10.7554/eLife.65895 (PMC8205486; doi:10.7554/eLife.65895)
Supplement: Figure 5—figure supplement 2—source data 1. [file elife-65895-fig5-figsupp2-data1.xlsx]

## Sheet: Sheet1
Adults	Control	GMRD903>LoafHA	dve+vg>LoafHA	ap+tj>LoafHA
	0	6.451	0	6.061
% R7 mistargeting	0	0	0	0
	3.57	12.2	0	6.061
	6.9	3.333	8.889	3.571
	15.15	0	2.857	7.692
	11.11	2.381	0	2.778
	3.7	6.667	4.255	7.895
	7.41	9.677	2.222	0
	15.79	0		11.42
	6.06			6.061
	0			2.703
				8.108
