# Supplementary material for: R7 photoreceptor axon targeting depends on the relative levels of lost and found expression in R7 and its synaptic partners
Source: eLife. 2021 May 18;10:e65895. doi: 10.7554/eLife.65895 (PMC8205486; doi:10.7554/eLife.65895)
Supplement: Figure 5—source data 1. [file elife-65895-fig5-data1.xlsx]

## Sheet: Sheet1
Adults
	loafΔ33/Δ20	GMR9D03-GAL4 rescue	GH146-GAL4 rescue	dve-GAL4 rescue	vg-GAL4 rescue	dve-GAL4+vg-GAL4 rescue	ap-GAL4 rescue	ap-GAL4+tj-GAL4 rescue
% R7 mistargeting	11.4286	22.86	0	11.11	22.22	34.28	5.26316	26.92
	10	11.54	12.12	19.35	16.667	12.12	4.25532	20
	0	26.47	6.06	0	25.91	19.23	0	9.38
	14.2857	13.04	0	11.11	18.51	16.667	21.6216	23.53
	0	31.58	3.25	13.79	18.18	17.39	17.5	15.38
	8.82353	2.86	7.401	14.81	14.81	19.04	16.129	24.14
	7.4	9.68	9.375	20.83	0	37.14	3.7037	36.67
	14.29	40.63	2.94	20	18.51	16	15.3846	11.11
	12.12	34.38	0	18.51	10.81	13.63	17.0732	37.5
	4	29.03	22.22	0	3.226	35.71	28	24.14
		26.47	4.347		5.714	17.95	22.2222	38.24
		16.67	4			19.44	19.4444	15.38
			0			13.79	25.8065	27.59
			20			20.83	17.3913	19.23
						16	26.087	22.8571
						23.53		16.6667
						21.74
						20
