# Supplementary material for: R7 photoreceptor axon targeting depends on the relative levels of lost and found expression in R7 and its synaptic partners
Source: eLife. 2021 May 18;10:e65895. doi: 10.7554/eLife.65895 (PMC8205486; doi:10.7554/eLife.65895)
Supplement: Figure 6—figure supplement 1—source data 1. [file elife-65895-fig6-figsupp1-data1.xlsx]

## Sheet: Sheet1
	Loaf	Sdk	GFP
	3	8	3
number of cells in aggregates	3	1	2
	1	4	1
	1	7	1
	1	6	1
	2	1	1
	1	6	1
	1	1	2
	1	1	2
	1	1	1
	1	7	1
	2	3	2
	1	7	1
	2	17	4
	1	2	1
	1	7	2
	1	10	2
	1	12	4
	3	1	1
	1	1	2
	2		2
	2		1
	2		2
	5		2
	2		1
	2		1
	2		2
	3
	2
	1
	1
	1
	2
	1
	3
	1
	3
	1
	1
	1
	6
	3
	1
	4
	3
	1
	1
	1
	1
	2
	1
	3
	2
	4
	1
	1
	1
	1
	2
	1
	1
	1
	2
