# Supplementary material for: R7 photoreceptor axon targeting depends on the relative levels of lost and found expression in R7 and its synaptic partners
Source: eLife. 2021 May 18;10:e65895. doi: 10.7554/eLife.65895 (PMC8205486; doi:10.7554/eLife.65895)
Supplement: Figure 6—source data 1. [file elife-65895-fig6-data1.xlsx]

## Sheet: Sheet1
	Hrs	Rab7	Arl8	Vha55
Pearson's correlation with Loaf-HA	0.3808	0.5516	0.04669	0.1287
	0.4739	0.5363	0.006877	0.1826
	0.2828	0.5549	0.07593	0.1473
	0.3198	0.5886	0.07333	0.1373
	0.2344	0.5418	0.01425	0.1505
	0.2873	0.6556	0.2762	0.124
	0.3874	0.5861	0.1332	0.2896
	0.3998	0.5841	0.118	0.04555
	0.3688	0.5933	0.1575	0.1383
	0.3423	0.5506	0.1092	0.2188
	0.3459	0.3662	0.005508	0.2663
	0.3345	0.4203	0.03718	0.1517
	0.7252	0.5611	0.05052	0.2335
	0.6266	0.6053	0.09146	-0.05699
	0.4075	0.4315	0.1178	0.1663
	0.7463	0.4908	-0.05688	-0.1562
	0.6258	0.5542	0.1102	0.2913
	0.7106	0.3843	0.2816	0.4418
	0.5612	0.3732	0.005448	0.1042
	0.6237	0.2853	0.1179	0.101
	0.6788	0.4243	0.09266	0.1272
	0.6534	0.4591	0.115	0.1308
	0.4407	0.4503	0.02719	0.1587
	0.4625	0.4087	0.1138	0.4341
	0.251	0.4632	0.05825	0.1438
	0.5451	0.5395	0.03452	0.1306
	0.1823	0.4741	0.1451	0.1303
	0.5389	0.3845	0.02225	0.3013
	0.4639	0.3935	0.08527	0.1154
	0.4711	0.437	0.05879	0.1532
	0.534	0.6025	0.06313	0.1921
	0.4391	0.7432	-0.03251	0.07798
	0.2365	0.4454	-0.006205	0.008481
	0.3859	0.5133	0.131	0.2525
	0.4349	0.4642	0.2028	0.1433
	0.7116	0.739	0.09947	0.1559
	0.6988	0.5935	0.2343	0.09557
	0.6602	0.5555	0.1839	0.1987
	0.5291	0.5915	0.2546	0.07232
	0.606	0.4558	0.2066	-0.1779
	0.7819	0.7333	0.1866	0.01308
	0.6034	0.4642	0.2709	-0.04663
	0.5605	0.2656	0.3441	0.07124
	0.6187	0.6186	0.2056	0.01732
	0.6602	0.3546	0.2375	0.1453
	0.7324	0.5726	0.1299	0.1269
	0.6982	0.7065	0.2325	0.1157
	0.7048	0.5679	0.3049	0.1348
	0.556	0.5879	0.03806	-0.04814
	0.6409	0.6347	0.108	0.2216
	0.7613	0.7146	0.243	0.08736
	0.5891	0.6224	0.1592	0.1027
	0.6947	0.5209	0.09199	0.2306
	0.5592	0.4761	0.09308	0.2562
	0.6623	0.5214	0.2076	0.3075
	0.6038	0.5901	-0.03435	0.4944
	0.43	0.6352	0.02458	0.2264
	0.6813	0.5512	0.03769	0.3277
	0.4782	0.5746	0.2643	0.2465
	0.7163	0.6766	0.2528
	0.6988	0.4826	0.1378
	0.5762	0.2145	0.101
	0.6117	0.4848	0.2527
	0.5481	0.4728	0.1967
	0.5483	0.4586	0.2731
	0.6263	0.3645	0.1436
	0.5001	0.4377	0.1672
	0.7518	0.4123	0.1312
	0.3624	0.2743	0.1723
	0.2575	0.4912	0.1254
	0.5108	0.3035	0.091
	0.2377	0.3351	0.01517
	0.4506	0.4148	0.1583
	0.3717	0.4024	0.3259
	0.2176	0.4085	0.1825
	0.1576	0.4794	0.121
	0.07593	0.4727	-0.03737
	0.5274	0.6259	0.09571
	0.4946	0.6496	0.2091
	0.4537	0.5123	0.204
	0.4884	0.5202	0.2376
	0.4777	0.5024	0.1936
	0.3312	0.6466	0.08592
	0.5329	0.458	0.1578
	0.3803	0.5363	0.2336
	0.403	0.4112
	0.5177	0.4264
	0.5742	0.447
	0.6806	0.5266
	0.4711	0.559
	0.4348	0.48
	0.5399	0.2951
	0.2969	0.6913
	0.5351	0.4507
	0.5159	0.5508
	0.5087	0.4494
	0.6014	0.6402
	0.3319	0.5647
	0.4533	0.5741
	0.5035	0.6107
	0.3814
	0.4784
	0.5278
	0.4792
	0.5401
	0.3432
	0.2426
	0.5261
	0.5109
	0.5861
	0.3721
	0.6501
	0.5338
	0.5663
	0.4862
	0.4764
	0.4877
	0.4168
	0.557
	0.5497
	0.4636
	0.4986
	0.5169
	0.58
	0.4781
	0.4809
	0.253
	0.6779
	0.4391
	0.4965
	0.5271
