# Supplementary material for: R7 photoreceptor axon targeting depends on the relative levels of lost and found expression in R7 and its synaptic partners
Source: eLife. 2021 May 18;10:e65895. doi: 10.7554/eLife.65895 (PMC8205486; doi:10.7554/eLife.65895)
Supplement: Figure 7—figure supplement 1—source data 1. [file elife-65895-fig7-figsupp1-data1.xlsx]

## Sheet: Sheet1
Adults						Adults	Liprin-α	GMR>loaf RNAiBL	Liprin-α; GMR>loaf RNAiBL
	loafΔ33clones	loafΔ33clones; LarHA	LarHA clones	LarHA, LoafHA clones		% R7 mistargeting	9.375	66.6667	82.14
% R7 mistargeting	55.5	25	9	0			16.13	52	88.89
	50	22	0	0			28.57	65.625	84.85
	66.6	12	9	7.6			25	81.0811	66.67
	87.5	0	0	0			24	51.5152	79.17
	33.3	9	8	0			36	78.7879	78.62
	75	0	0	11			39.29	56.4103	90
	18.8	0					34.62	35.2941	84.21
	25	14					33.33	55.5556	78.57
	35.2	10					14.29	44.8276	97.3
	40	18					21.88	58.3333
	35.7
	7.9
	18.8
	45.45
	66.67
	30
	57.14
	37.5
	57.14
