# Supplementary material for: R7 photoreceptor axon targeting depends on the relative levels of lost and found expression in R7 and its synaptic partners
Source: eLife. 2021 May 18;10:e65895. doi: 10.7554/eLife.65895 (PMC8205486; doi:10.7554/eLife.65895)
Supplement: Figure 7—source data 1. [file elife-65895-fig7-data1.xlsx]

## Sheet: Sheet1
Adults	lGMR>Lar RNAi	lGMR>loaf RNAi	lGMR>Lar+loaf RNAi
% R7 mistargeting	39.29	13.16	83.33
	45.71	19.44	89.29
	42.11	13.79	94.44
	55.56	18.18	84.62
	37.5	14.81	100
	45.16	17.5	87.5
	53.13	24.24	93.94
	37.5	16.22	95.65
	45.45	25.64	89.29
	51.85	25	76.92
	30.3	5.56	85.71
	61.11		93.94
Adults	UAS-Lrp4, UAS-loafHA clones										UAS-Lrp4 clones											loafΔ33clones; UAS-Lrp4
M3 clumping	0	16.67	45.45	26.08	0	9.09	18.18	17.64	43.33		25	6.67	25	18.18	56.25	25	25	33.33	23.07	36.36		0	0	0	0	0	0	0	0	0
M6 clumping	42.85	50	0	39.13	35.71	36.36	36.36	47.06	40		33.33	20	33.33	18.18	18.75	25	15	33.33	30.77	36.36		0	0	0	0	10	0	0	0	0
overshooting	28.57	16.67	18.18	13.04	35.71	22.73	18.18	11.76	10		0	6.67	0	0	6.25	0	20	6.67	0	0		0	0	0	7.69	0	10	0	0	0
